# Supplementary material
Source: PubMed Central journal article supplement (PMC3126409)
Supplement: supp_77_9_2847__2.pdf [file supp_77_9_2847__2.pdf]

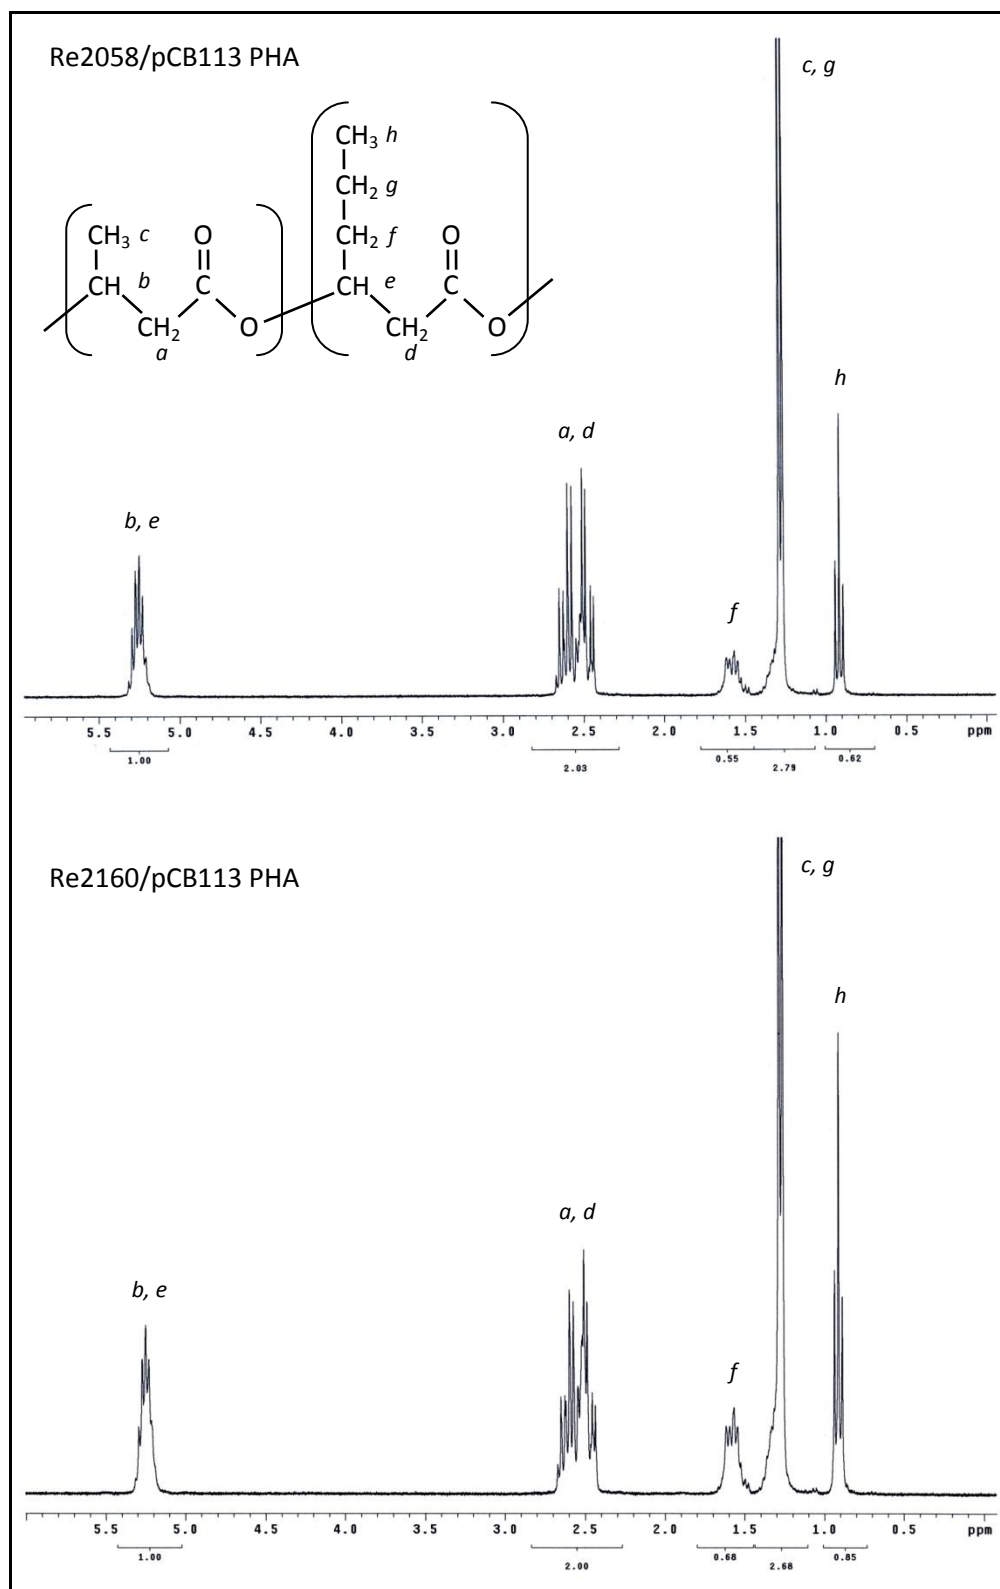

**FIG. S2.**  $^1\text{H}$  NMR spectra in  $\text{CDCl}_3$  of P(HB-*co*-HHx) isolated from Re2058/pCB113 and Re2160/pCB113. Based on the area of peak *h*, it was estimated that the Re2058/pCB113 contained 21mol% HHx, while the Re2160/pCB113 PHA contained 28mol% HHx.
