# Supplementary material
Source: PubMed Central journal article supplement (PMC3126409)
Supplement: supp_77_9_2847__3.pdf [file supp_77_9_2847__3.pdf]

**TABLE S1.** Primers used in the construction of plasmids and strains are described below. Primers 1-2 were used to insert a *SwaI* site into pGY46. Primers 3-6 were used to amplify *R. aetherivorans* I24 PHA synthase genes. Primers 7-8 were used to amplify *P. aeruginosa phaJ1*. Primers 9-10 were used to amplify the PHA operon from Re2152 so that it could be cloned into pBBR1MCS-2. Primers 11-16 were used to delete *proC* from the *R. eutropha* genome. Primers 17-18 were used to amplify the *proC* region of the *R. eutropha* genome so that it could be cloned into pCB81.

| Primer | Name                       | Sequence (5' to 3')                                     | Comment                                         |
|--------|----------------------------|---------------------------------------------------------|-------------------------------------------------|
| 1      | pGY46 <i>SwaI</i> F        | GGCAGAGAGACAATCAAATC <u>ATTTAAAT</u> GCTTGCATGAG        | <i>SwaI</i> site underlined                     |
| 2      | pGY46 <i>SwaI</i> R        | GATTTGATTGTCTCTCTGCCGTCACTATTC                          |                                                 |
| 3      | <i>phaC1</i> Ra F          | <u>ATTTAAAT</u> AGGAGATGTCCCATGCTCGACCA                 | <i>SwaI</i> site underlined                     |
| 4      | <i>phaC1</i> Ra R          | <u>ATTTAAAT</u> CAGCTGAAGACGTACGT                       | <i>SwaI</i> site underlined                     |
| 5      | <i>phaC2</i> Ra F          | <u>ATTTAAAT</u> AGGAGGAGGCGCATGATGGCCCA                 | <i>SwaI</i> site underlined                     |
| 6      | <i>phaC2</i> Ra R          | <u>ATTTAAAT</u> CAGCCGGCGGGCAGGTGCGCA                   | <i>SwaI</i> site underlined                     |
| 7      | <i>phaJ1</i> Pa F          | <u>GGCGCGCCAAGGAGATCTCC</u> ATGAGCCAGGTCCAGAACATTCC     | <i>AscI</i> site underlined, RBS italicized     |
| 8      | <i>phaJ1</i> Pa R          | GGT <u>TAAATTAAG</u> ACGGTAGGGAAAGCCGCTCAGCCGATGCTGATCG | <i>PacI</i> site underlined                     |
| 9      | PHA operon F               | GATATCGGT <u>ACCCATC</u> CTTCTCGCCTATGCTC               | <i>KpnI</i> site underlined                     |
| 10     | PHA operon R               | GATATCA <u>AAGCTT</u> CTGCCCCTGATTCTATGCCAAC            | <i>HindIII</i> site underlined                  |
| 11     | <i>proC</i> upstream F     | CGGATCCCTACGTCCAGGAAGGCGTCGAC                           | <i>BamHI</i> site underlined                    |
| 12     | <i>proC</i> upstream R     | <u>GCCGATTTAAATGCCG</u> ATCGAGCATGGAGATCCGTTG           | Overlap region with <i>SwaI</i> site underlined |
| 13     | <i>proC</i> downstream F   | <u>CGGCATTTAAATCGGC</u> ATTGAGGCGGGCCAAAC               | Overlap region with <i>SwaI</i> site underlined |
| 14     | <i>proC</i> downstream R   | CGGATCCCGTTCTTCAAGCGCTTCTTTGCG                          | <i>BamHI</i> site underlined                    |
| 15     | <i>proC</i> diag F         | GGTCAATATCAGCGGCGAAG                                    |                                                 |
| 16     | <i>proC</i> diag R         | CGATCATGCTCTGCTATGCC                                    |                                                 |
| 17     | <i>proC</i> region clone F | <u>GACCGGTGGACATC</u> CTTGTGCGTCATC                     | <i>AgeI</i> site underlined                     |
| 18     | <i>proC</i> region clone R | <u>GACCGGTGGTATC</u> ATTACACGCTGATTCGTGAC               | <i>AgeI</i> site underlined                     |
